# Supplementary material
Source: PubMed Central journal article supplement (PMC4623844)
Supplement: qai-70-e10-s001.pdf [file qai-70-e10-s001.pdf]

**Supplemental Table 1.** Temporal variation in characteristics of OHTN Cohort Study participants in annual HIV care (a)

|                                      | In care in 2001<br>n=3,081 |       | In care in 2006<br>n=3,161 |       | In care in 2011<br>n=3,674 |       |
|--------------------------------------|----------------------------|-------|----------------------------|-------|----------------------------|-------|
| <b>Age</b>                           |                            |       |                            |       |                            |       |
| <30                                  | 175                        | 5.7%  | 195                        | 5.5%  | 197                        | 5.4%  |
| 30-34                                | 395                        | 12.8% | 270                        | 7.6%  | 223                        | 6.1%  |
| 35-49                                | 1981                       | 64.3% | 2125                       | 59.7% | 1823                       | 49.6% |
| 50+                                  | 530                        | 17.2% | 967                        | 27.2% | 1431                       | 38.9% |
| Mean (SD)                            | 41.6 (8.7)                 |       | 44.4 (9.6)                 |       | 47.1 (10.3)                |       |
| <b>Sex</b>                           |                            |       |                            |       |                            |       |
| Male                                 | 2688                       | 87.3% | 3005                       | 84.5% | 3028                       | 84.5% |
| Female                               | 392                        | 12.7% | 551                        | 15.5% | 644                        | 15.5% |
| <b>HIV risk category</b>             |                            |       |                            |       |                            |       |
| MSM                                  | 1985                       | 65.9% | 2220                       | 63.9% | 2232                       | 62.3% |
| MSM-IDU                              | 151                        | 5.0%  | 182                        | 5.2%  | 185                        | 5.2%  |
| IDU                                  | 245                        | 8.1%  | 232                        | 6.7%  | 231                        | 6.4%  |
| Heterosexual/other                   | 630                        | 20.9% | 840                        | 24.2% | 934                        | 26.1% |
| Missing                              | 70                         |       | 83                         |       | 92                         |       |
| <b>Region</b>                        |                            |       |                            |       |                            |       |
| Toronto                              | 1816                       | 58.9% | 2337                       | 65.7% | 2483                       | 67.6% |
| East & North                         | 844                        | 27.4% | 714                        | 20.1% | 625                        | 17.0% |
| West                                 | 421                        | 13.7% | 506                        | 14.2% | 566                        | 15.4% |
| <b>Race/ethnicity</b>                |                            |       |                            |       |                            |       |
| White                                | 2236                       | 72.6% | 2361                       | 66.4% | 2273                       | 61.9% |
| African/Caribbean/Black              | 272                        | 8.8%  | 454                        | 12.8% | 589                        | 16.0% |
| Indigenous                           | 231                        | 7.5%  | 282                        | 7.93% | 320                        | 8.71% |
| Other                                | 342                        | 11.1% | 460                        | 12.9% | 492                        | 13.4% |
| <b>Citizenship &amp; immigration</b> |                            |       |                            |       |                            |       |
| Canadian-born                        | 2307                       | 77.1% | 2502                       | 72.2% | 2448                       | 68.5% |
| Born outside Canada                  | 684                        | 22.9% | 961                        | 27.8% | 1125                       | 31.5% |
| Unknown                              | 90                         |       | 94                         |       | 101                        |       |
| <b>Year of HIV diagnosis</b>         |                            |       |                            |       |                            |       |
| <1990                                | 915                        | 29.7% | 766                        | 21.5% | 607                        | 16.5% |
| 1990-99                              | 2044                       | 66.3% | 1810                       | 50.9% | 1497                       | 40.7% |
| 2000-2004                            | 122                        | 3.96% | 820                        | 23.1% | 784                        | 21.3% |
| 2005-2010                            | n/a                        |       | 161                        | 4.53% | 688                        | 18.7% |
| <b>Years since HIV diagnosis</b>     |                            |       |                            |       |                            |       |
| Less than 5 years                    | 777                        | 25.2% | 843                        | 23.7% | 644                        | 17.5% |
| 5 to <10 years                       | 1093                       | 35.5% | 762                        | 21.4% | 786                        | 21.4% |
| 10 or more years                     | 1211                       | 39.3% | 1952                       | 54.9% | 2244                       | 61.1% |
| Mean (SD)                            | 8.5(4.5)                   |       | 10.8 (6.1)                 |       | 13.2 (7.4)                 |       |

| ART regimen among treated participants |     |       |      |       |      |       |
|----------------------------------------|-----|-------|------|-------|------|-------|
| PI-based                               | 966 | 41.2% | 1167 | 42.2% | 1235 | 37.8% |
| NNRTI-based                            | 598 | 25.5% | 879  | 31.8% | 1118 | 34.2% |
| PI & NNRTI                             | 614 | 26.2% | 525  | 19.0% | 411  | 12.6% |
| NRTI only                              | 158 | 6.73% | 80   | 2.9%  | 52   | 1.59% |
| Any new agent (b)                      | 11  | 0.5%  | 115  | 4.16% | 452  | 13.8% |

Values shown are frequencies and percentages unless otherwise indicated. Percentages were calculated using values available from participants with non-missing data.

SD, standard deviation. MSM, men who have sex with men; IDU, injection drug use. ART, antiretroviral treatment. PI, protease inhibitor. NNRTI, non-nucleoside reverse transcriptase inhibitor. NRTI, nucleoside reverse transcriptase inhibitor.

(a) Participants were defined as being “in care” if they had at least one record of an HIV viral load or CD4 cell count as recorded in their clinical chart or at least one HIV viral load linked from Public Health Ontario Laboratories.

(b) All combinations containing fusion inhibitors, CCR5 antagonists, and integrase strand transfer inhibitors (INSTIs).

**Supplemental Table 2.** Sensitivity analysis of proportion on ART according to varying assumptions for person-years when not in annual care (“gap year”) or when lost-to-follow-up

|                           | Primary analysis                      | Sensitivity analysis |                    |          |          |
|---------------------------|---------------------------------------|----------------------|--------------------|----------|----------|
|                           |                                       | A                    | B                  | C        | D        |
| Gap year                  | ART=0                                 | ART=0                | ART=<br>last known | ART=0    | Excluded |
| Lost-to-<br>follow-up     | ART=0 if gap;<br>last known if no gap | ART=0                | ART=<br>last known | Excluded | Excluded |
| Number of<br>person-years | 44,680                                | 44,680               | 44,680             | 37,014   | 35,759   |
| 2001                      | 67.6%                                 | 64.6%                | 72.0%              | 73.5%    | 77.4%    |
| 2002                      | 67.3%                                 | 63.4%                | 71.7%              | 73.5%    | 77.4%    |
| 2003                      | 65.8%                                 | 61.6%                | 70.7%              | 72.2%    | 76.1%    |
| 2004                      | 66.9%                                 | 62.5%                | 71.6%              | 73.9%    | 77.4%    |
| 2005                      | 66.9%                                 | 62.3%                | 71.9%              | 74.9%    | 78.2%    |
| 2006                      | 67.6%                                 | 63.0%                | 73.0%              | 76.2%    | 79.1%    |
| 2007                      | 69.4%                                 | 64.6%                | 75.1%              | 78.8%    | 81.2%    |
| 2008                      | 71.9%                                 | 67.0%                | 77.4%              | 82.4%    | 84.2%    |
| 2009                      | 74.0%                                 | 69.0%                | 79.4%              | 85.3%    | 86.8%    |
| 2010                      | 75.2%                                 | 69.6%                | 81.6%              | 87.7%    | 89.4%    |
| 2011                      | 77.3%                                 | 71.5%                | 83.7%              | 89.5%    | 91.0%    |

**Supplemental Table 3a.** Effect of calendar year on the relation between sex, years since HIV diagnosis, and years since initiated ART with the proportion in annual care, OHTN Cohort Study, 2001-2011

|                                  | 2001                                  | 2006                                  | 2011                                  |
|----------------------------------|---------------------------------------|---------------------------------------|---------------------------------------|
|                                  | Adjusted ratio of proportions (95%CI) | Adjusted ratio of proportions (95%CI) | Adjusted ratio of proportions (95%CI) |
| <b>Sex</b>                       |                                       |                                       |                                       |
| Male: reports sex with men       | 1.00                                  | 1.00                                  | 1.00                                  |
| Male: no sex with men/unknown    | 1.01 (0.97, 1.04)                     | 0.97 (0.94, 1.00)                     | 0.93 (0.89, 0.96)                     |
| Female                           | 1.02 (0.99, 1.04)                     | 1.01 (0.99, 1.03)                     | 1.00 (0.98, 1.03)                     |
| <b>Years since HIV diagnosis</b> |                                       |                                       |                                       |
| <1 year                          | 1.00                                  | 1.00                                  | 1.00                                  |
| 1 to <5 years                    | 0.99 (0.96, 1.01)                     | 0.96 (0.95, 0.97)                     | 0.93 (0.91, 0.95)                     |
| 5 to <10 years                   | 0.97 (0.94, 1.00)                     | 0.93 (0.91, 0.94)                     | 0.88 (0.86, 0.91)                     |
| 10 or more years                 | 0.96 (0.94, 0.99)                     | 0.89 (0.88, 0.91)                     | 0.82 (0.80, 0.85)                     |
| <b>Years since initiated ART</b> |                                       |                                       |                                       |
| Unknown time on ARV              | 0.72 (0.60, 0.87)                     | 0.67 (0.57, 0.79)                     | 0.62 (0.50, 0.76)                     |
| Treatment naive                  | 0.88 (0.85, 0.92)                     | 0.90 (0.88, 0.91)                     | 0.91 (0.88, 0.94)                     |
| Off treatment                    | 0.94 (0.91, 0.97)                     | 0.90 (0.88, 0.92)                     | 0.87 (0.83, 0.90)                     |
| 1 to <5 years                    | 0.98 (0.96, 1.01)                     | 0.99 (0.98, 1.00)                     | 1.00 (0.98, 1.02)                     |
| <1 year                          | 1.00                                  | 1.00                                  | 1.00                                  |
| 5 to <10 years                   | 0.98 (0.96, 1.00)                     | 0.99 (0.98, 1.01)                     | 1.00 (0.98, 1.03)                     |
| 10 or more years                 | 0.98 (0.95, 1.01)                     | 1.00 (0.98, 1.02)                     | 1.01 (0.98, 1.05)                     |

**Supplemental Table 3b.** Effect of sex on the relation between history of injection drug use with the proportion in annual care, OHTN Cohort Study, 2001-2011

|                                      | Male: reports sex with men            | Male: no sex with men or unknown      | Female                                |
|--------------------------------------|---------------------------------------|---------------------------------------|---------------------------------------|
|                                      | Adjusted ratio of proportions (95%CI) | Adjusted ratio of proportions (95%CI) | Adjusted ratio of proportions (95%CI) |
| <b>History of injection drug use</b> |                                       |                                       |                                       |
| Yes                                  | 1.00 (0.98, 1.03)                     | 0.89 (0.84, 0.94)                     | 0.93 (0.88, 0.99)                     |
| No                                   | 1.00                                  | 1.00                                  | 1.00                                  |

Ratios of proportions estimated using multivariable Poisson regression within a generalized estimating equation framework and auto-regressive correlation structure. Adjusted for year, age, sex, history of injection drug use, region of Ontario, race/ethnicity, citizenship and immigration, years since HIV diagnosis, years since initiated ART, and clinic.  $P < 0.001$  for all interaction terms.

**Supplemental Table 4.** Effect of calendar year on the relation between years since initiated ART with the proportion in continuous care, OHTN Cohort Study, 2001-2011

|                           | 2001                                  | 2006                                  | 2011                                  |
|---------------------------|---------------------------------------|---------------------------------------|---------------------------------------|
|                           | Adjusted ratio of proportions (95%CI) | Adjusted ratio of proportions (95%CI) | Adjusted ratio of proportions (95%CI) |
| Years since initiated ART |                                       |                                       |                                       |
| Unknown time              | 0.87 (0.72, 1.04)                     | 0.85 (0.77, 0.94)                     | 0.83 (0.73, 0.95)                     |
| Treatment naïve           | 0.83 (0.79, 0.87)                     | 0.86 (0.84, 0.88)                     | 0.89 (0.86, 0.93)                     |
| Off treatment             | 0.99 (0.94, 1.04)                     | 0.93 (0.90, 0.95)                     | 0.87 (0.83, 0.91)                     |
| <1 year                   | 1.00                                  | 1.00                                  | 1.00                                  |
| 1 to <5 years             | 1.08 (1.04, 1.12)                     | 1.01 (0.99, 1.03)                     | 0.95 (0.92, 0.98)                     |
| 5 to <10 years            | 1.08 (1.04, 1.12)                     | 1.01 (0.99, 1.03)                     | 0.94 (0.92, 0.97)                     |
| 10 or more years          | 1.10 (1.06, 1.15)                     | 1.02 (1.00, 1.04)                     | 0.94 (0.92, 0.97)                     |

Ratios of proportions estimated using multivariable Poisson regression within a generalized estimating equation framework and auto-regressive correlation structure. Adjusted for year, age, sex, history of injection drug use, region of Ontario, race/ethnicity, citizenship and immigration, years since HIV diagnosis, years since initiated ART and clinic.  $P < 0.001$  for the interaction term.

**Supplemental Table 5.** Effect of sex on the relation between citizenship and immigration and years since HIV diagnosis with the proportion on ART, OHTN Cohort Study, 2001-2011

|                                    | Male: reports sex with men            | Male: no sex with men / unknown       | Female                                |
|------------------------------------|---------------------------------------|---------------------------------------|---------------------------------------|
|                                    | Adjusted ratio of proportions (95%CI) | Adjusted ratio of proportions (95%CI) | Adjusted ratio of proportions (95%CI) |
| <b>Citizenship and immigration</b> |                                       |                                       |                                       |
| Canadian-born                      | 1.00                                  | 1.00                                  | 1.00                                  |
| Immigrant                          | 1.01 (0.98, 1.04)                     | 1.02 (0.96, 1.08)                     | 1.16 (1.09, 1.24)                     |
| Unknown status                     | 1.04 (0.92, 1.17)                     | 1.00 (0.92, 1.09)                     | 1.00 (0.85, 1.17)                     |
| <b>Years since HIV diagnosis</b>   |                                       |                                       |                                       |
| <1 year                            | 1.00                                  | 1.00                                  | 1.00                                  |
| 1 to <5 years                      | 1.26 (1.20, 1.31)                     | 1.14 (1.07, 1.21)                     | 1.02 (0.95, 1.10)                     |
| 5 to <10 years                     | 1.37 (1.31, 1.44)                     | 1.20 (1.12, 1.29)                     | 1.15 (1.06, 1.24)                     |
| 10 or more years                   | 1.41 (1.35, 1.48)                     | 1.26 (1.17, 1.36)                     | 1.21 (1.12, 1.31)                     |

Ratios of proportions estimated using multivariable Poisson regression within a generalized estimating equation framework and auto-regressive correlation structure. Adjusted for year, age, sex, history of injection drug use, region of Ontario, race/ethnicity, citizenship and immigration, years since HIV diagnosis, clinic and interaction terms listed.  $P < 0.001$  for all interaction terms.

**Supplemental Table 6.** Effect of calendar year on the relation between years since initiated ART with the proportion with suppressed viral load, OHTN Cohort Study, 2001-2011

|                             | 2001                                  | 2006                                  | 2011                                  |
|-----------------------------|---------------------------------------|---------------------------------------|---------------------------------------|
|                             | Adjusted ratio of proportions (95%CI) | Adjusted ratio of proportions (95%CI) | Adjusted ratio of proportions (95%CI) |
| 1 to <5 years vs <1 year    | 1.20 (1.12, 1.30)                     | 1.22 (1.18, 1.27)                     | 1.24 (1.17, 1.32)                     |
| 5 to <10 years vs <1 year   | 1.06 (0.99, 1.15)                     | 1.16 (1.12, 1.21)                     | 1.27 (1.20, 1.35)                     |
| 10 or more years vs <1 year | 1.01 (0.93, 1.09)                     | 1.13 (1.09, 1.17)                     | 1.26 (1.19, 1.34)                     |

Ratios of proportions estimated using multivariable Poisson regression within a generalized estimating equation framework and auto-regressive correlation structure. Adjusted for year, age, sex, history of injection drug use, region of Ontario, race/ethnicity, citizenship and immigration, years since initiated ART, regimen and clinic.  $P < 0.001$  for the interaction term.

**Supplemental Table 7.** Effect of calendar year on the relation between years since initiated ART with the proportion with undetectable viral load, OHTN Cohort Study, 2001-2011

|                              | 2001                                  | 2006                                  | 2011                                  |
|------------------------------|---------------------------------------|---------------------------------------|---------------------------------------|
|                              | Adjusted ratio of proportions (95%CI) | Adjusted ratio of proportions (95%CI) | Adjusted ratio of proportions (95%CI) |
| 1 to <5 years vs. <1 year    | 1.31 (1.20, 1.44)                     | 1.34 (1.28, 1.40)                     | 1.37 (1.27, 1.48)                     |
| 5 to <10 years vs. <1 year   | 1.15 (1.04, 1.27)                     | 1.27 (1.21, 1.33)                     | 1.40 (1.30, 1.51)                     |
| 10 or more years vs. <1 year | 1.11 (1.00, 1.23)                     | 1.24 (1.18, 1.31)                     | 1.39 (1.29, 1.50)                     |

Ratios of proportions estimated using multivariable Poisson regression within a generalized estimating equation framework and auto-regressive correlation structure. Adjusted for year, age, sex, history of injection drug use, region of Ontario, race/ethnicity, citizenship and immigration, years since initiated ART, regimen and clinic.  $P < 0.001$  for the interaction term.



**Supplemental Figure 1.** Clinical status according to CD4 cell count and HIV viral load among persons in annual HIV care, OHTN Cohort Study, 2001-2011

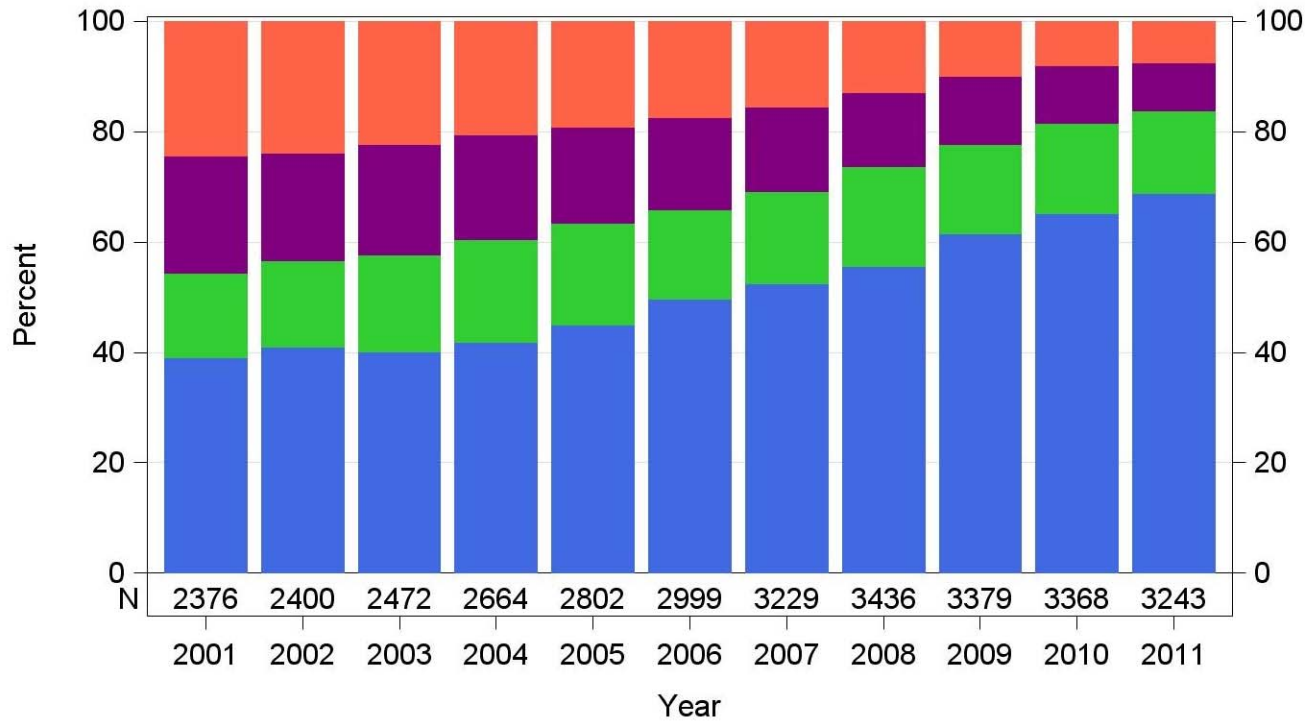

Blue: Viral load <200 copies/mL and CD4 cell count per mm<sup>3</sup> ≥350.  
 Green: Viral load <200 copies/mL and CD4 cell count per mm<sup>3</sup> <350.  
 Purple: Viral load ≥200 copies/mL and CD4 cell count per mm<sup>3</sup> ≥350.  
 Orange: Viral load ≥200 copies/mL and CD4 cell count per mm<sup>3</sup> <350.
